# Supplementary material for: Synthesis of a poly-pendant 1-D chain based on ‘trans-vanadium’ bicapped, Keggin-type vanadtungstate and its photocatalytic properties
Source: Royal Society of Chemistry journal article supplement (doi:10.1039/c4dt01575d), 2014-01-01
Supplement: c4dt01575d1.pdf [file c4dt01575d1.pdf]

## Supporting information

### **Synthesis of poly-pendant 1-D chain based on ‘trans-vanadium’ bicapped Keggin-type vanadtungstate and its photocatalytic properties**

**Qing Lan,<sup>a</sup> Zhi-Ming Zhang,<sup>\*a</sup> Yang-Guang Li,<sup>a</sup> Ying Lu,<sup>a</sup> En-Bo Wang<sup>\*a</sup>**

*<sup>a</sup>Key laboratory of Polyoxometalate Science of Ministry of Education, Department of Chemistry,*

*Northeast Normal University, Renmin Street No.5268, Changchun, Jilin, 130024, P. R. China. E-mail:*

*zhangzm178@nenu.edu.cn (Z. M. Zhang), wangeb889@nenu.edu.cn (E. B. Wang)*

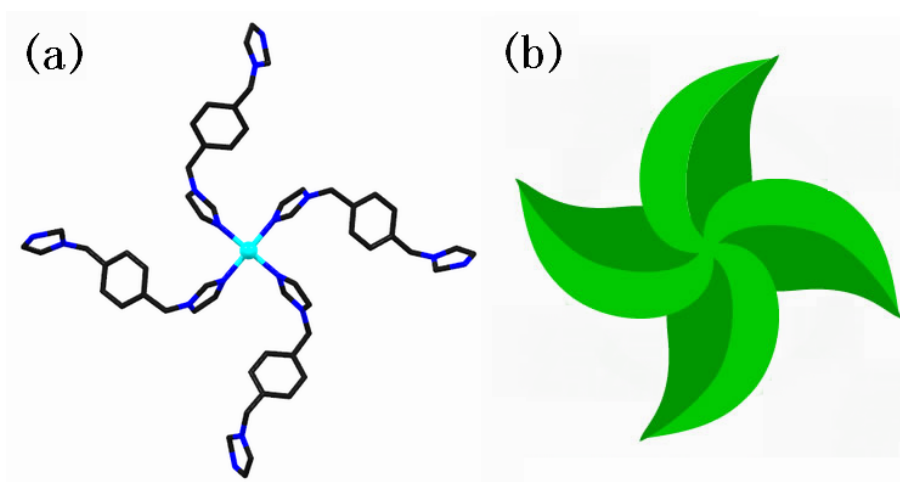

**Fig. S1.** (a) Polyhedral and ball-and-stick representation of the propeller-shaped structures of the  $[\text{NiL}_4]^{2+}$  complex fragments in compound **1**. (b) windmill.

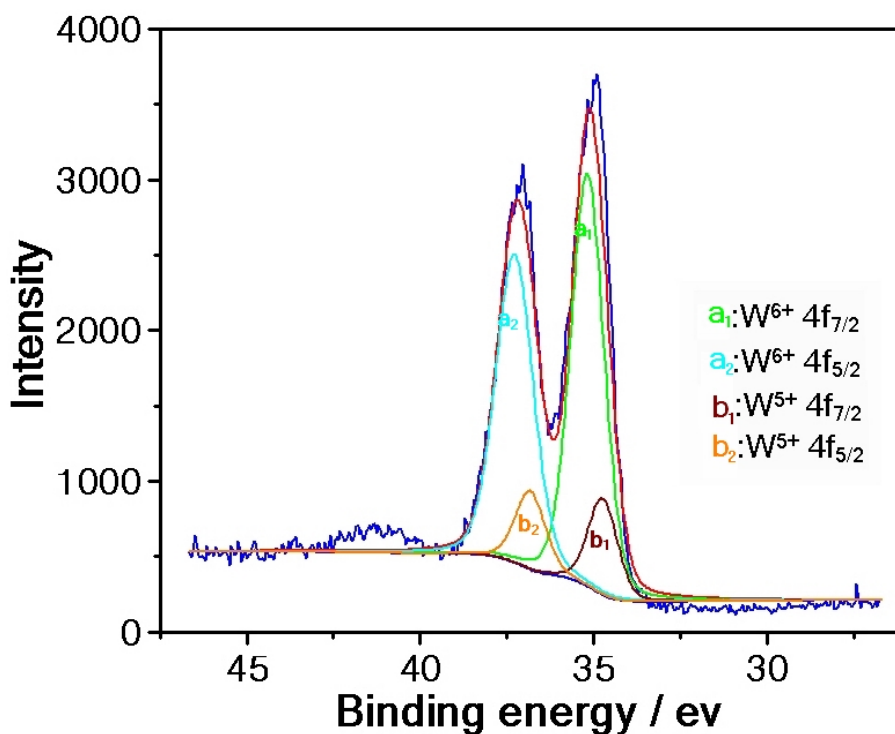

**Fig. S2.** XPS spectra of W4f level of compound **1**. The XPS of **1** show four partially overlapped peaks, and the fit of curve provides with positions of these four peaks at 34.7, 35.2, 36.8 and 37.3 eV attributing to  $\text{W}^{\text{V}} 4f_{7/2}$ ,  $\text{W}^{\text{VI}} 4f_{7/2}$ ,  $\text{W}^{\text{V}} 4f_{5/2}$  and  $\text{W}^{\text{VI}} 4f_{5/2}$ , respectively. The ratios of the peak are for  $\text{W}^{\text{V}}$  to  $\text{W}^{\text{VI}}$  is ca. 2 : 10.

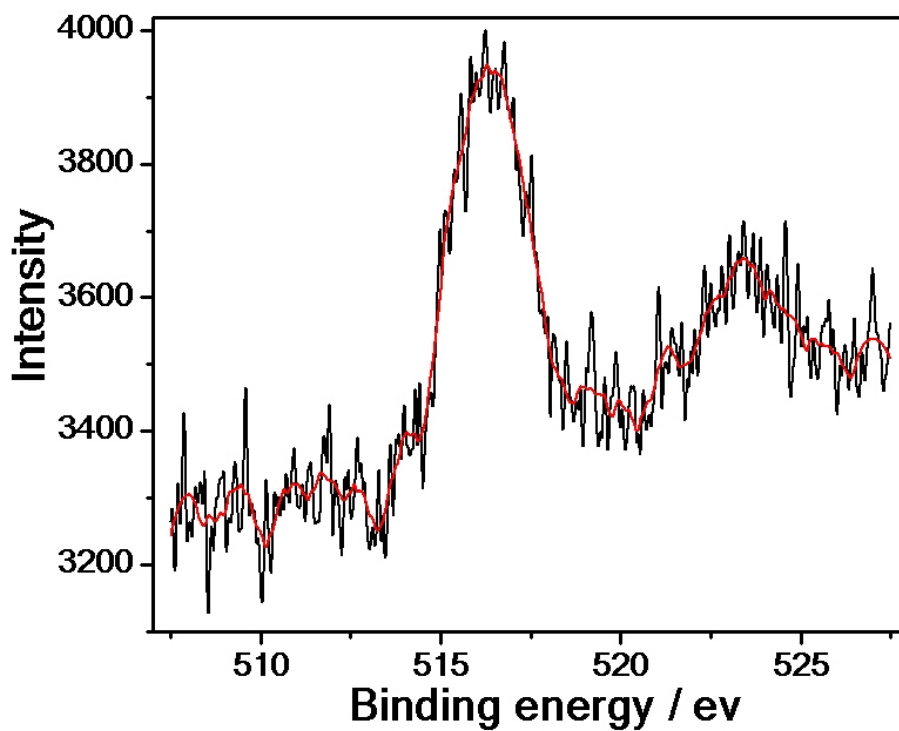

**Fig. S3.** The XPS spectra for V in compound **1**.

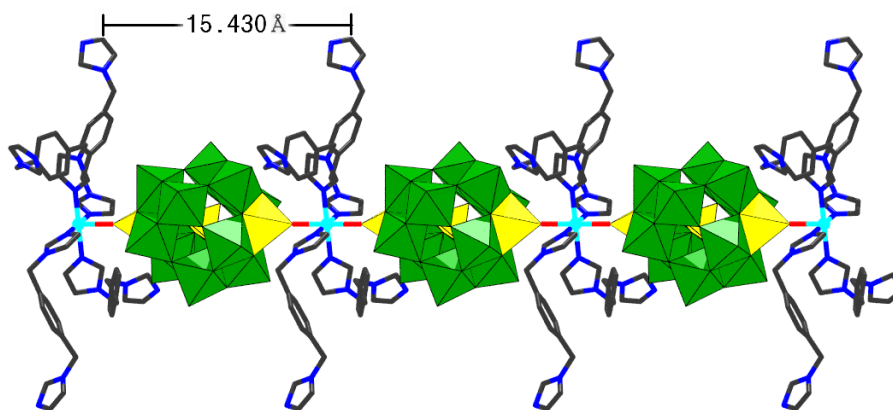

**Fig. S4.** View of the distance between the adjacent L pendants from two  $[\text{NiL}_4]^{2+}$  complexes in compound **1**.

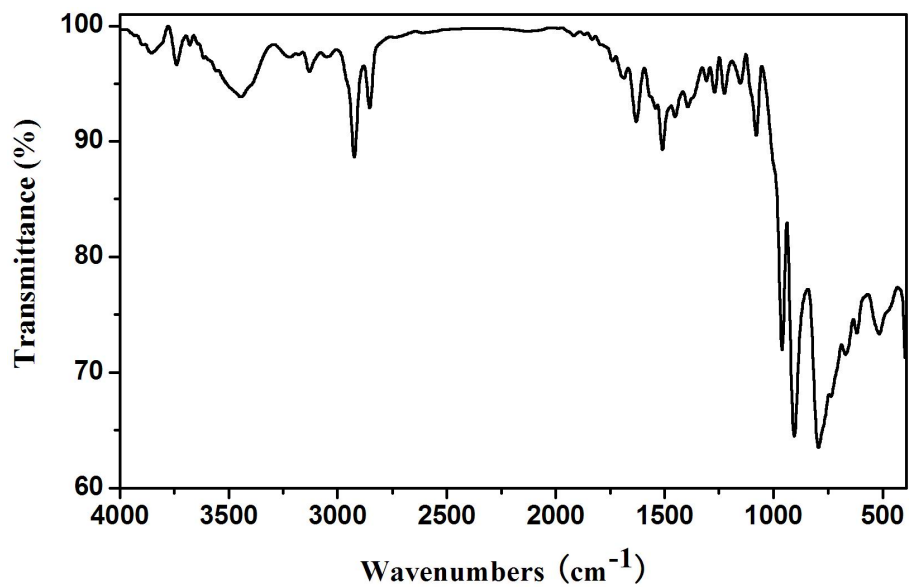

**Fig. S5.** IR spectrum of compound 1.

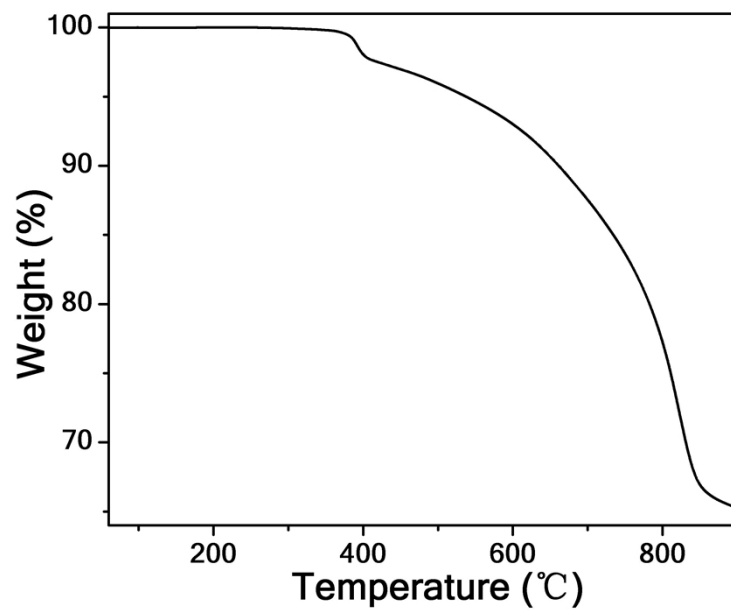

**Fig. S6.** TG curve for compound 1.

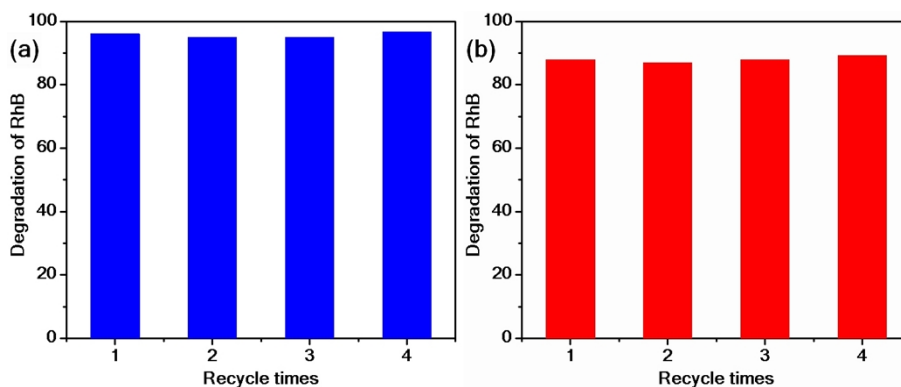

**Fig. S7.** Four cycles of photocatalytic degradation of MB (a) RhB (b) with compound 1.

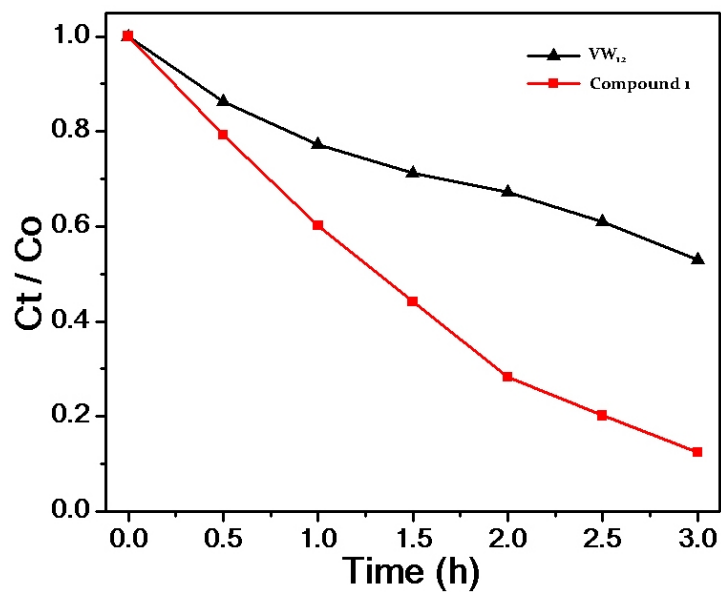

**Fig. S8.** Absorption spectra of the RhB solution during the decomposition reaction under UV light irradiation with the use of  $VW_{12}$  and compound 1.

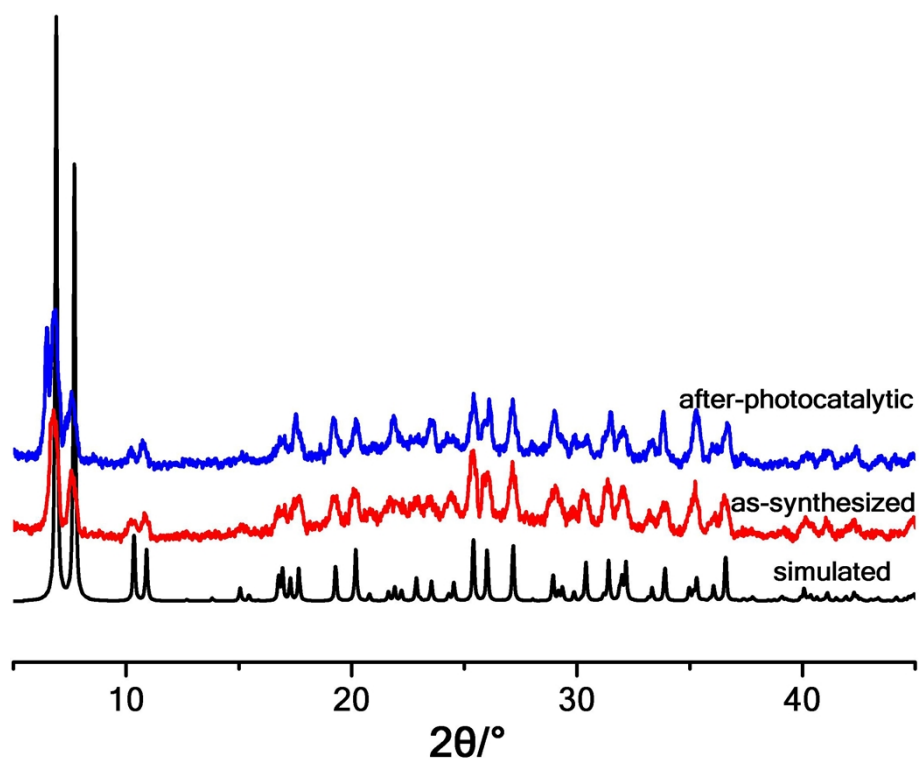

**Fig. S9.** The PXR D patterns of compound 1.

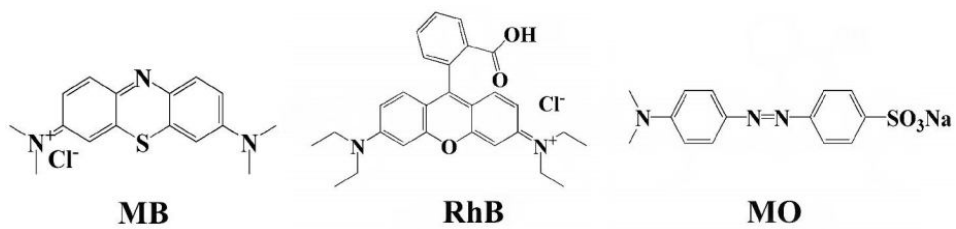

**Fig. S10.** The structures of methylene blue (MB), Rhodamine B (RhB) and methyl orange (MO).
